# Supplementary material for: Supramolecular chirality induced by chiral solvation in achiral cyclic Azo-containing polymers: topological effects on chiral aggregation
Source: Royal Society of Chemistry journal article supplement (doi:10.1039/c7py02002c), 2018-01-01
Supplement: c7py02002c1.pdf [file c7py02002c1.pdf]

## Supporting Information for

# Supramolecular Chirality Induced by Chiral Solvation in Achiral Cyclic Azo-containing Polymers: Topological Effects on Chiral Aggregation

Lu Yin, Meng Liu, Yin Zhao, Shuangshuang Zhang, Wei Zhang\*, Zhengbiao Zhang,  
Xiulin Zhu

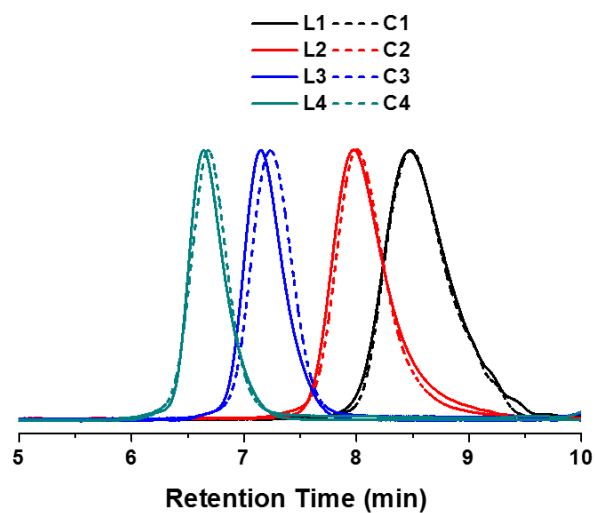

**Fig. S1** GPC curves of linear and cyclic side-chain Azo polymers with different molecular weights.

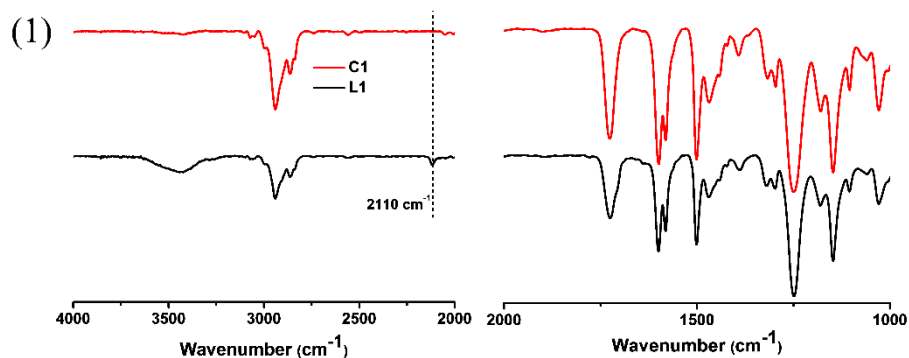

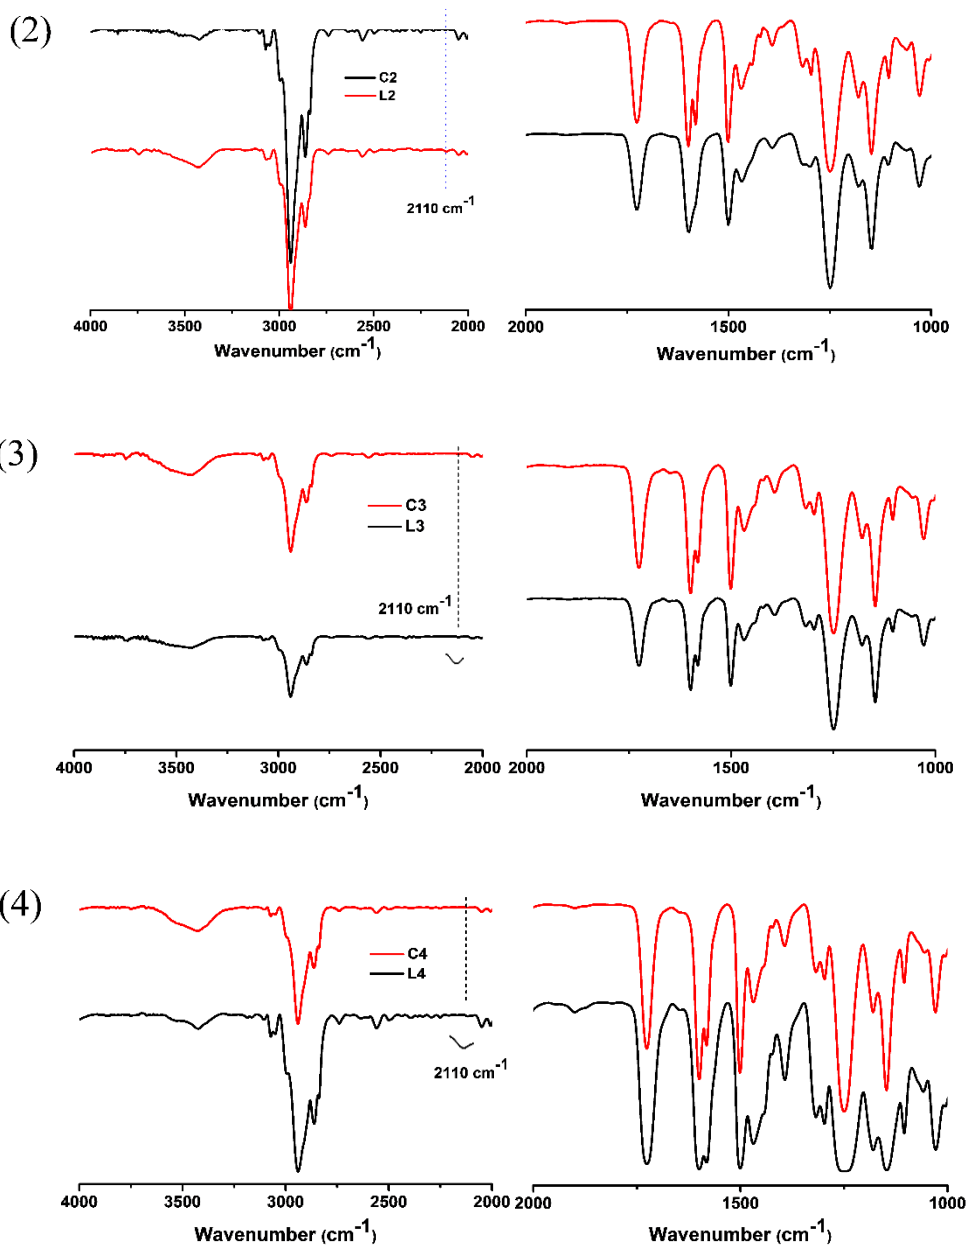

Fig. S2 Infrared spectra of linear- and cyclic side-chain Azo polymers

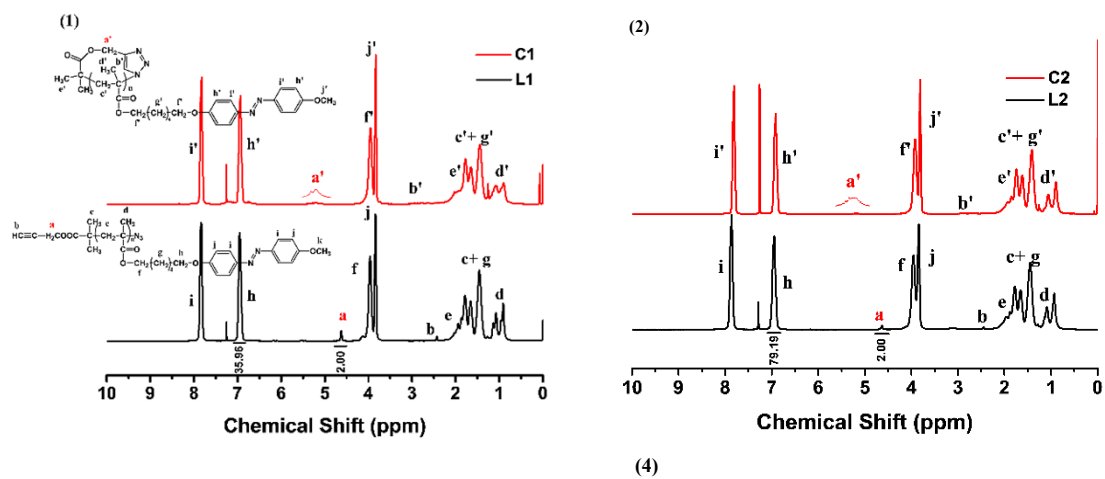

(3)

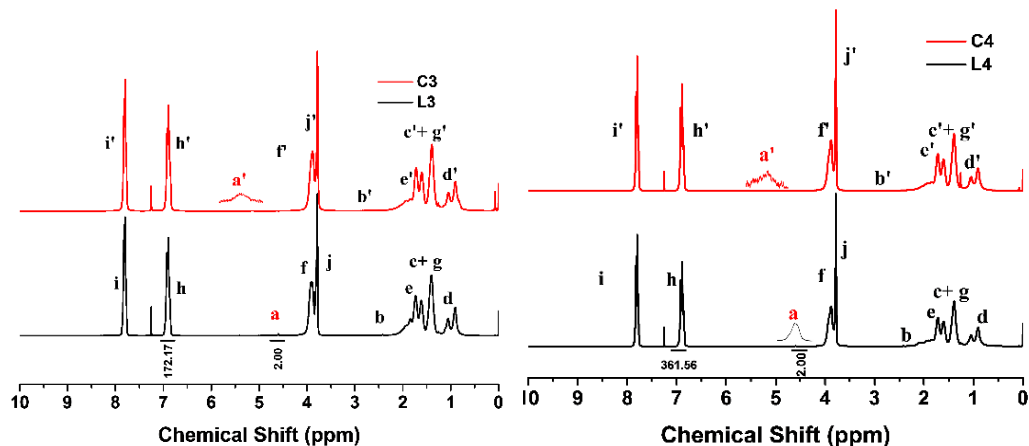

**Fig. S3**  $^1\text{H}$  NMR spectra of linear and cyclic Azo polymer

The molecular weight ( $M_{n,\text{NMR}}$ ) were calculated as follows. The integral ratio of  $I_h$  and  $I_a$  is  $I_h/2$ , which  $I_h$  is the integrations of benzene ring (4H) of repeating units at 7.1-6.7 ppm in  $^1\text{H}$  NMR spectra and  $I_a$  is set to 2 relative to the methylene next to alkynyl of the initiator. The equations of  $M_{n,\text{NMR}}$  and  $n_{(\text{NMR})}$  are as follows:

$$M_{n,\text{NMR}} = [I_h/4] \times M_{\text{monomer}} + M_{\text{initiator}}$$

$$n_{(\text{NMR})} = I_h/4$$

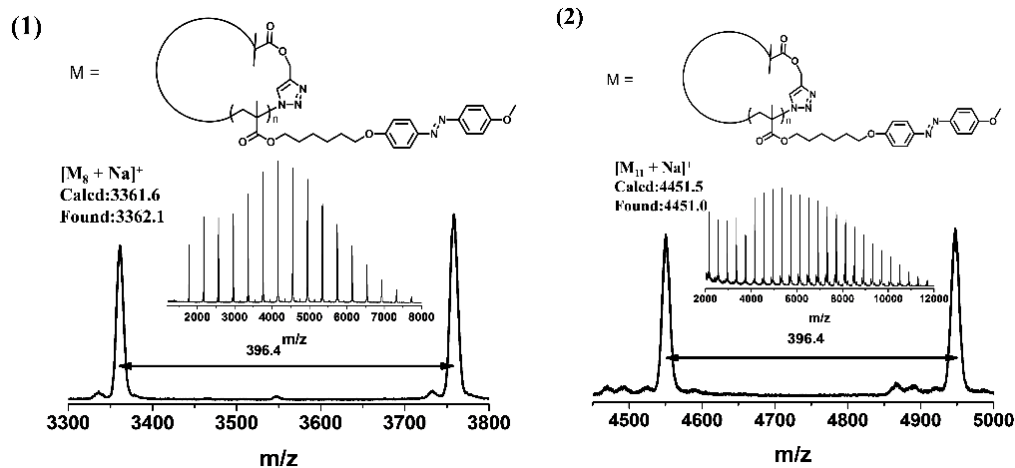

**Fig. S4** Expanded MALDI-TOF mass spectra of cyclic Azo polymers (C1 and C2) with the inserted full spectra.

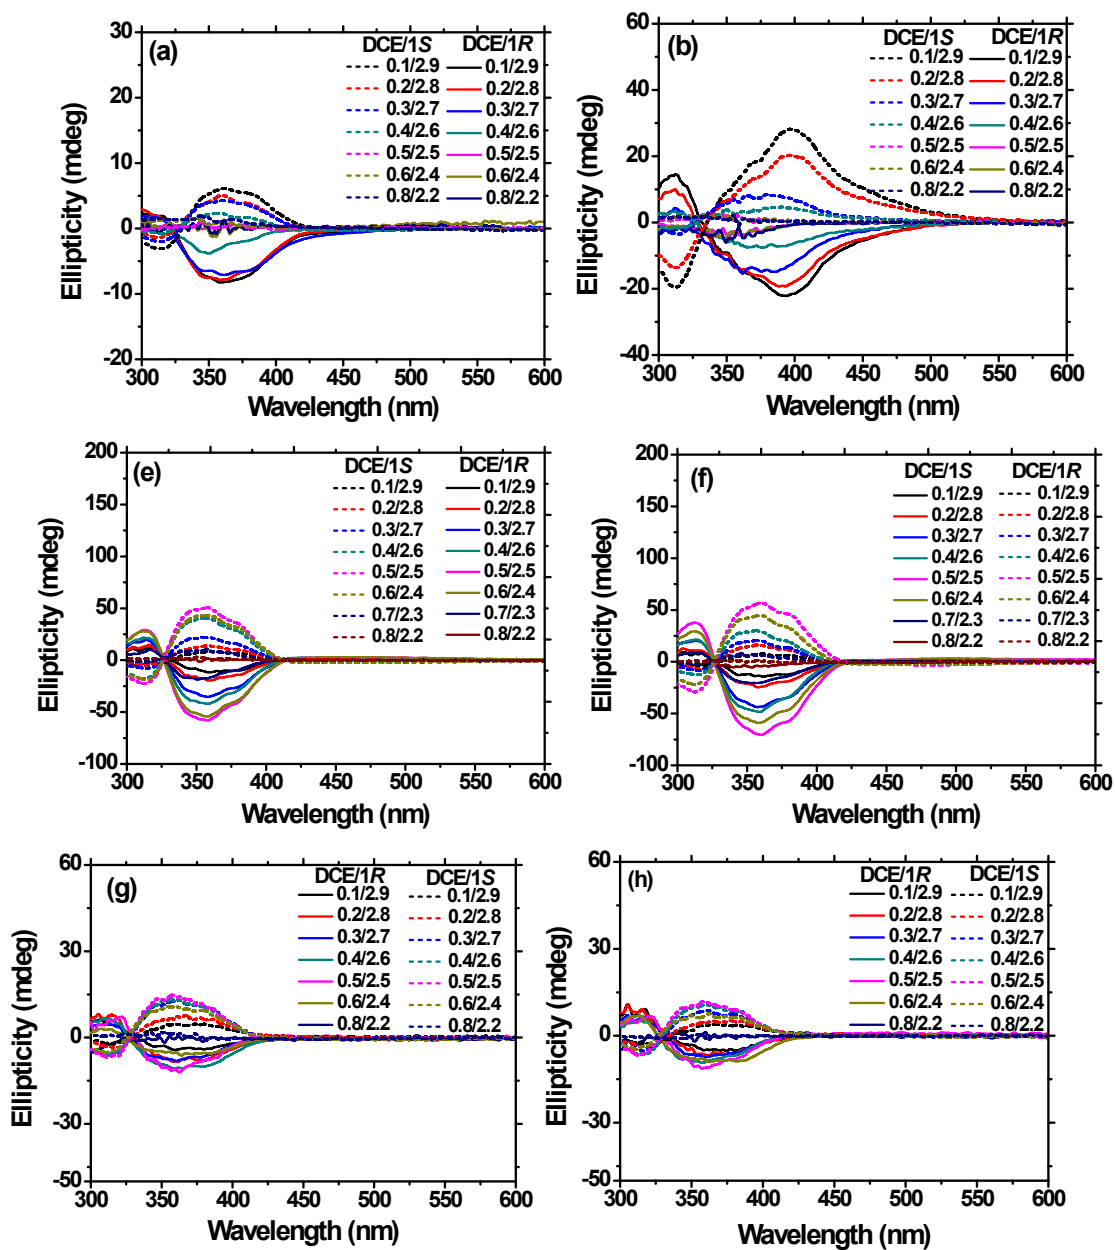

**Fig. S5** Circular dichroism (CD) spectra of linear and cyclic side-chain Azo polymer aggregates with different DCE/(1R or 1S) volume fractions. (a), (e) and (g) stand for C1, C3 and C4, respectively. (b), (f) and (h) stand for L1, L3 and L4, respectively. The concentration of polymer repeating unit is  $8.42 \times 10^{-5}$  mol/L.

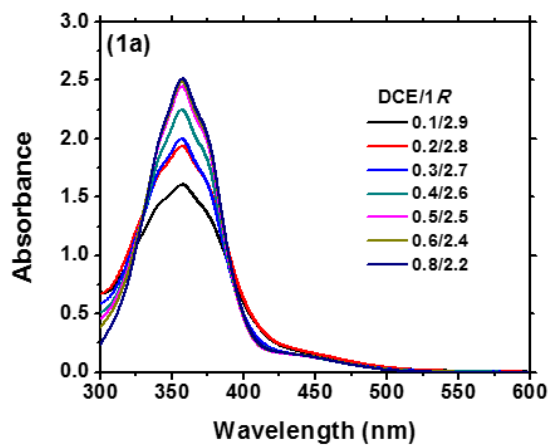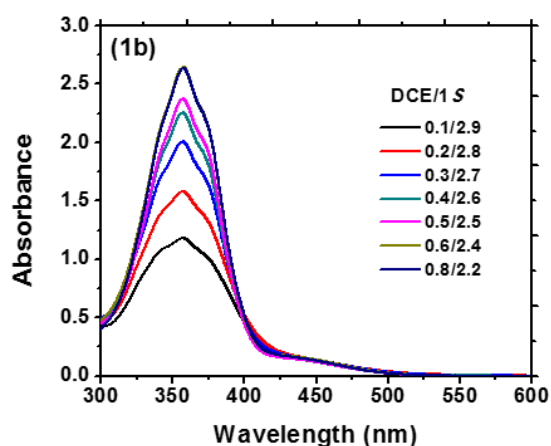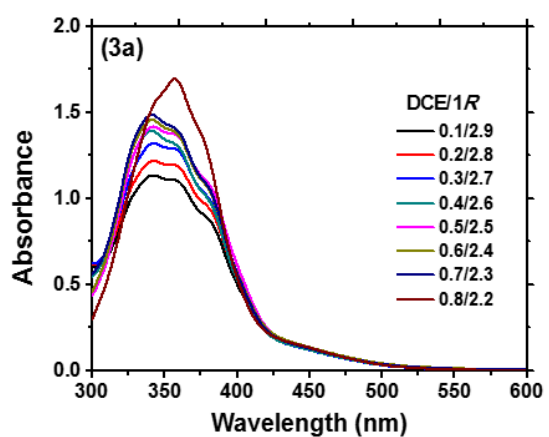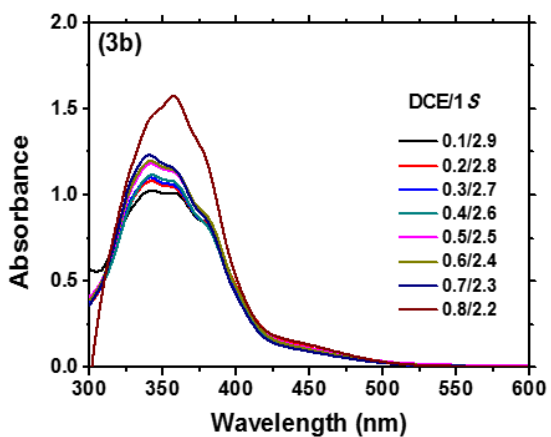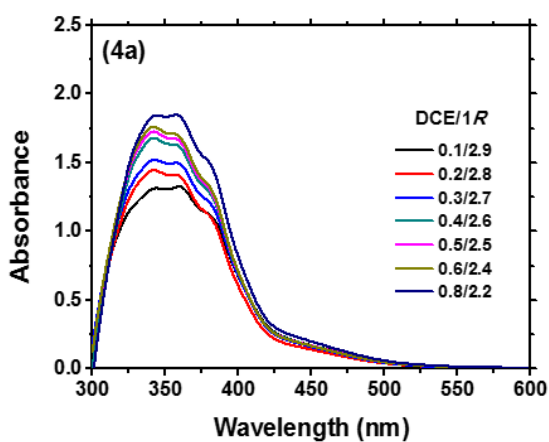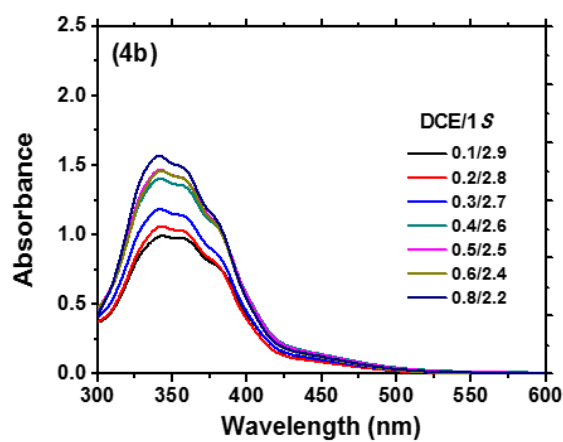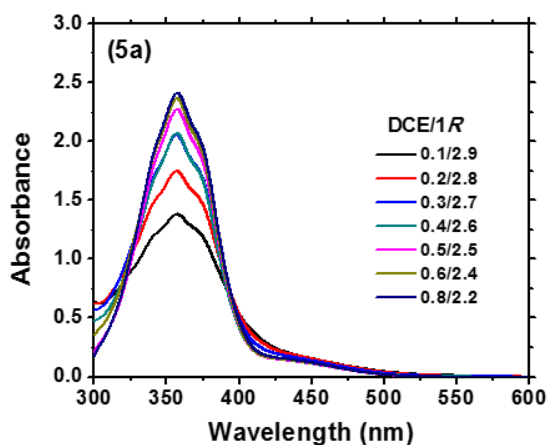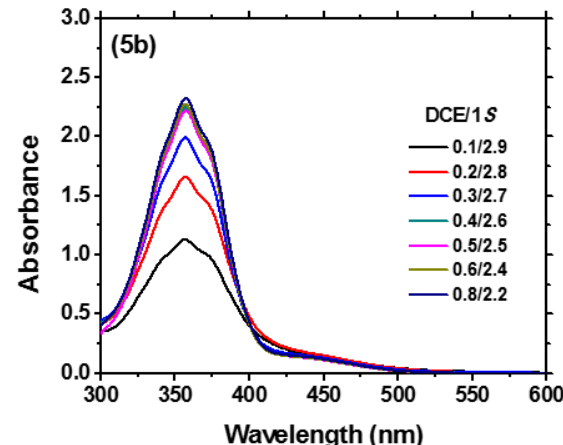

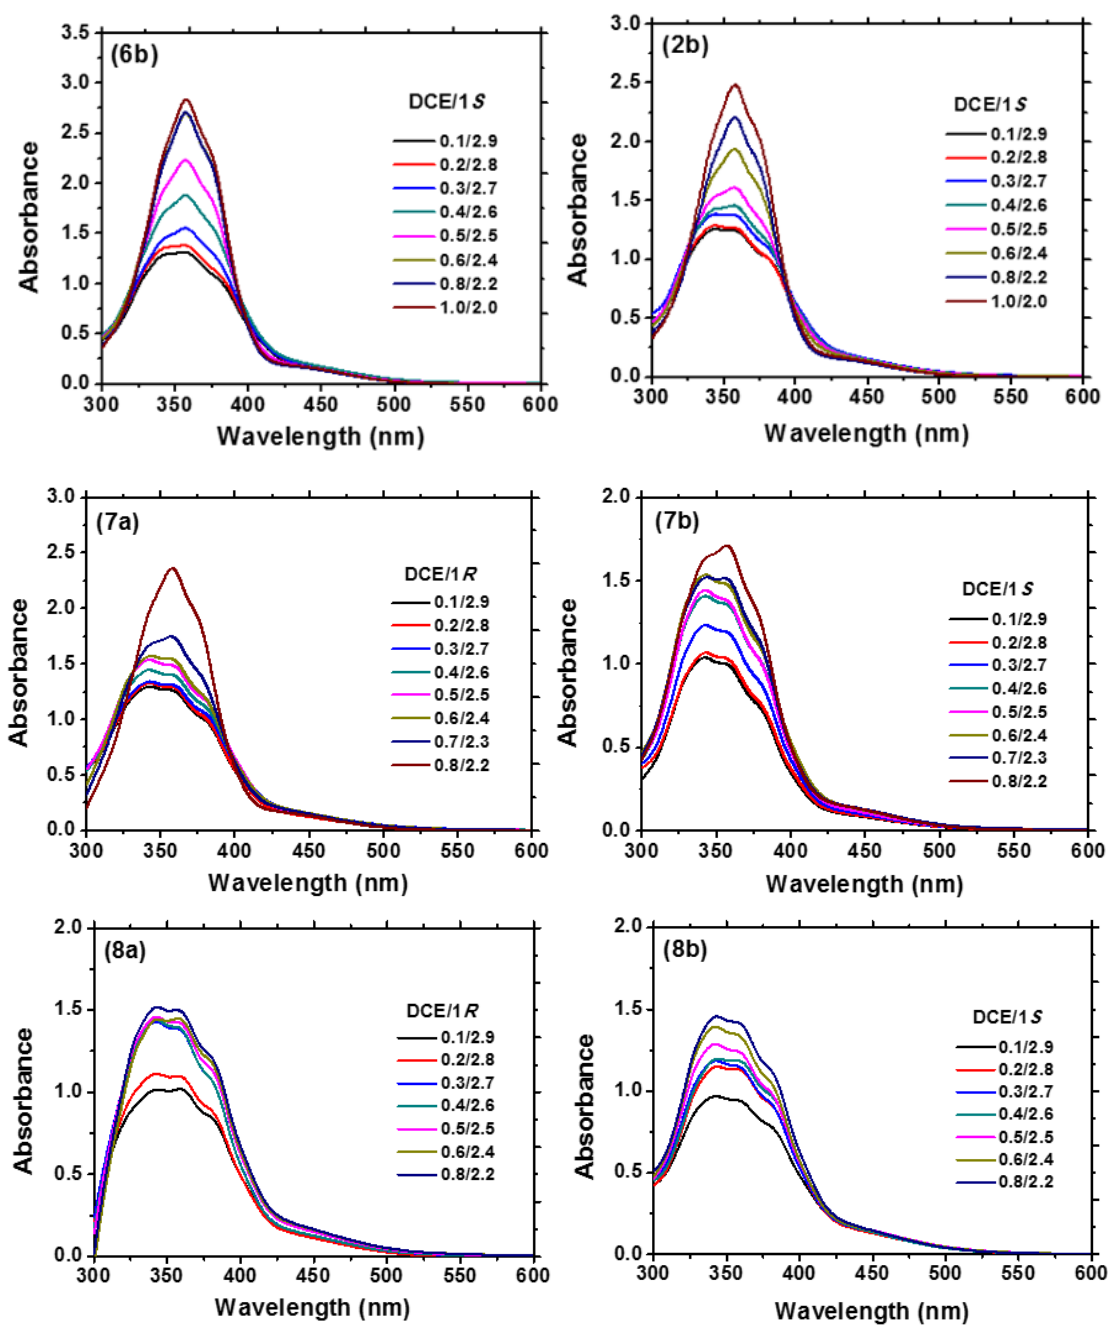

**Fig. S6** UV-vis spectra of cyclic and linear Azo polymer aggregates with different DCE/1*R* (a) and DCE/1*S* (b) volume fractions. 1-4 stands for C1, C2, C3 and C4, respectively. 5-8 stands for L1, L2, L3 and L4, respectively. The concentration of polymer repeating unit is  $8.42 \times 10^{-5}$  mol/L.

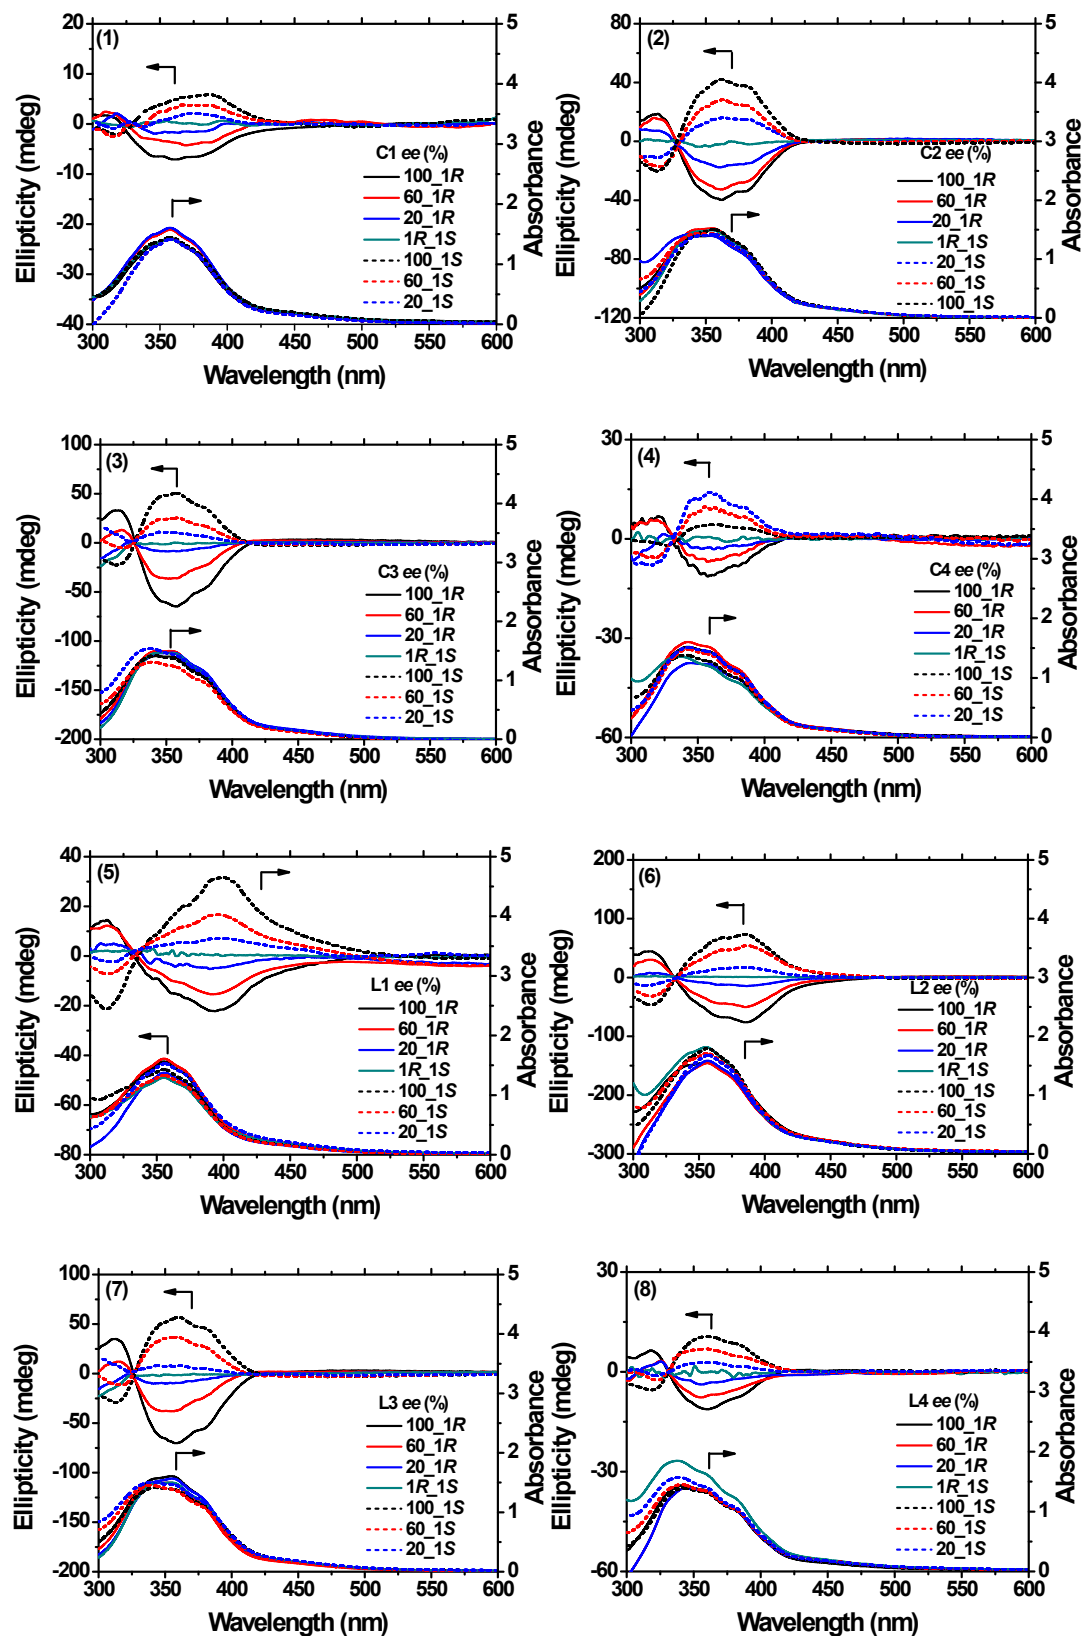

**Fig. S7** The changes in CD and UV-vis spectra of Azo polymer aggregates with different enantiopurity of limonene. DCE/(1R+1S) are 0.1/2.9, 0.5/2.5, 0.5/2.5 and 0.5/2.5 (v/v) for L1, L2, L3 and L4 respectively, and 0.1/2.9, 0.4/2.6, 0.5/2.5 and 0.5/2.5

(v/v) for C1, C2, C3 and C4 respectively. The concentration of polymer repeating unit is  $8.42 \times 10^{-5}$  mol/L. 1-4 stands for C1, C2, C3 and C4, respectively. 5-8 stands for L1, L2, L3 and L4, respectively.

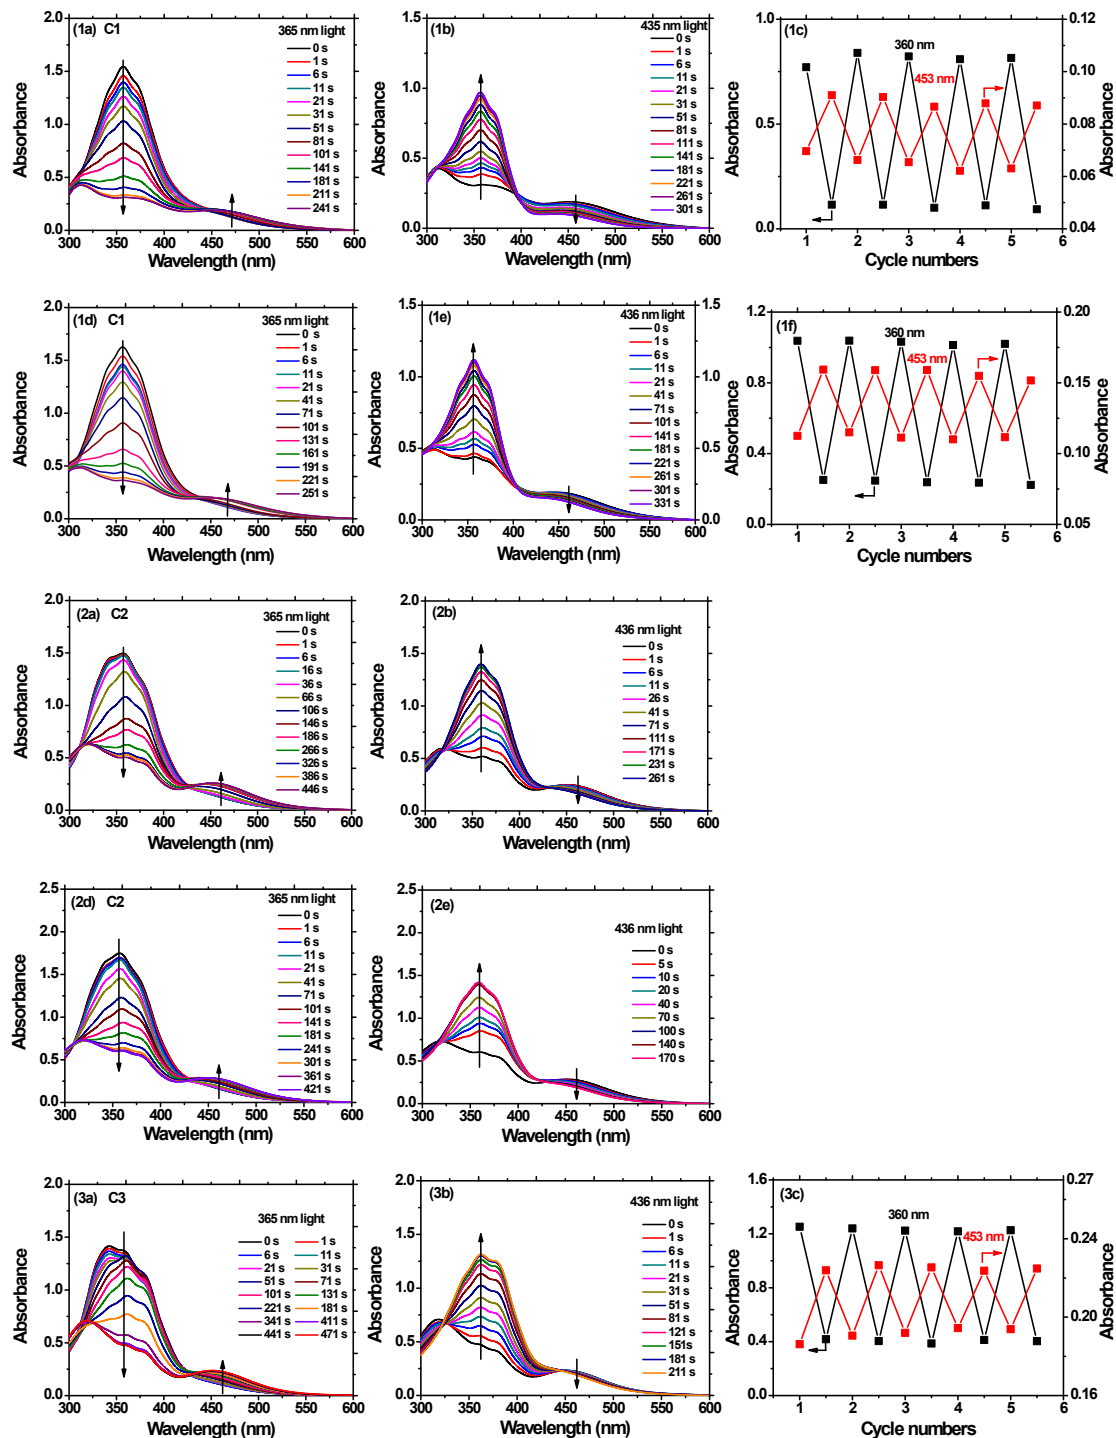



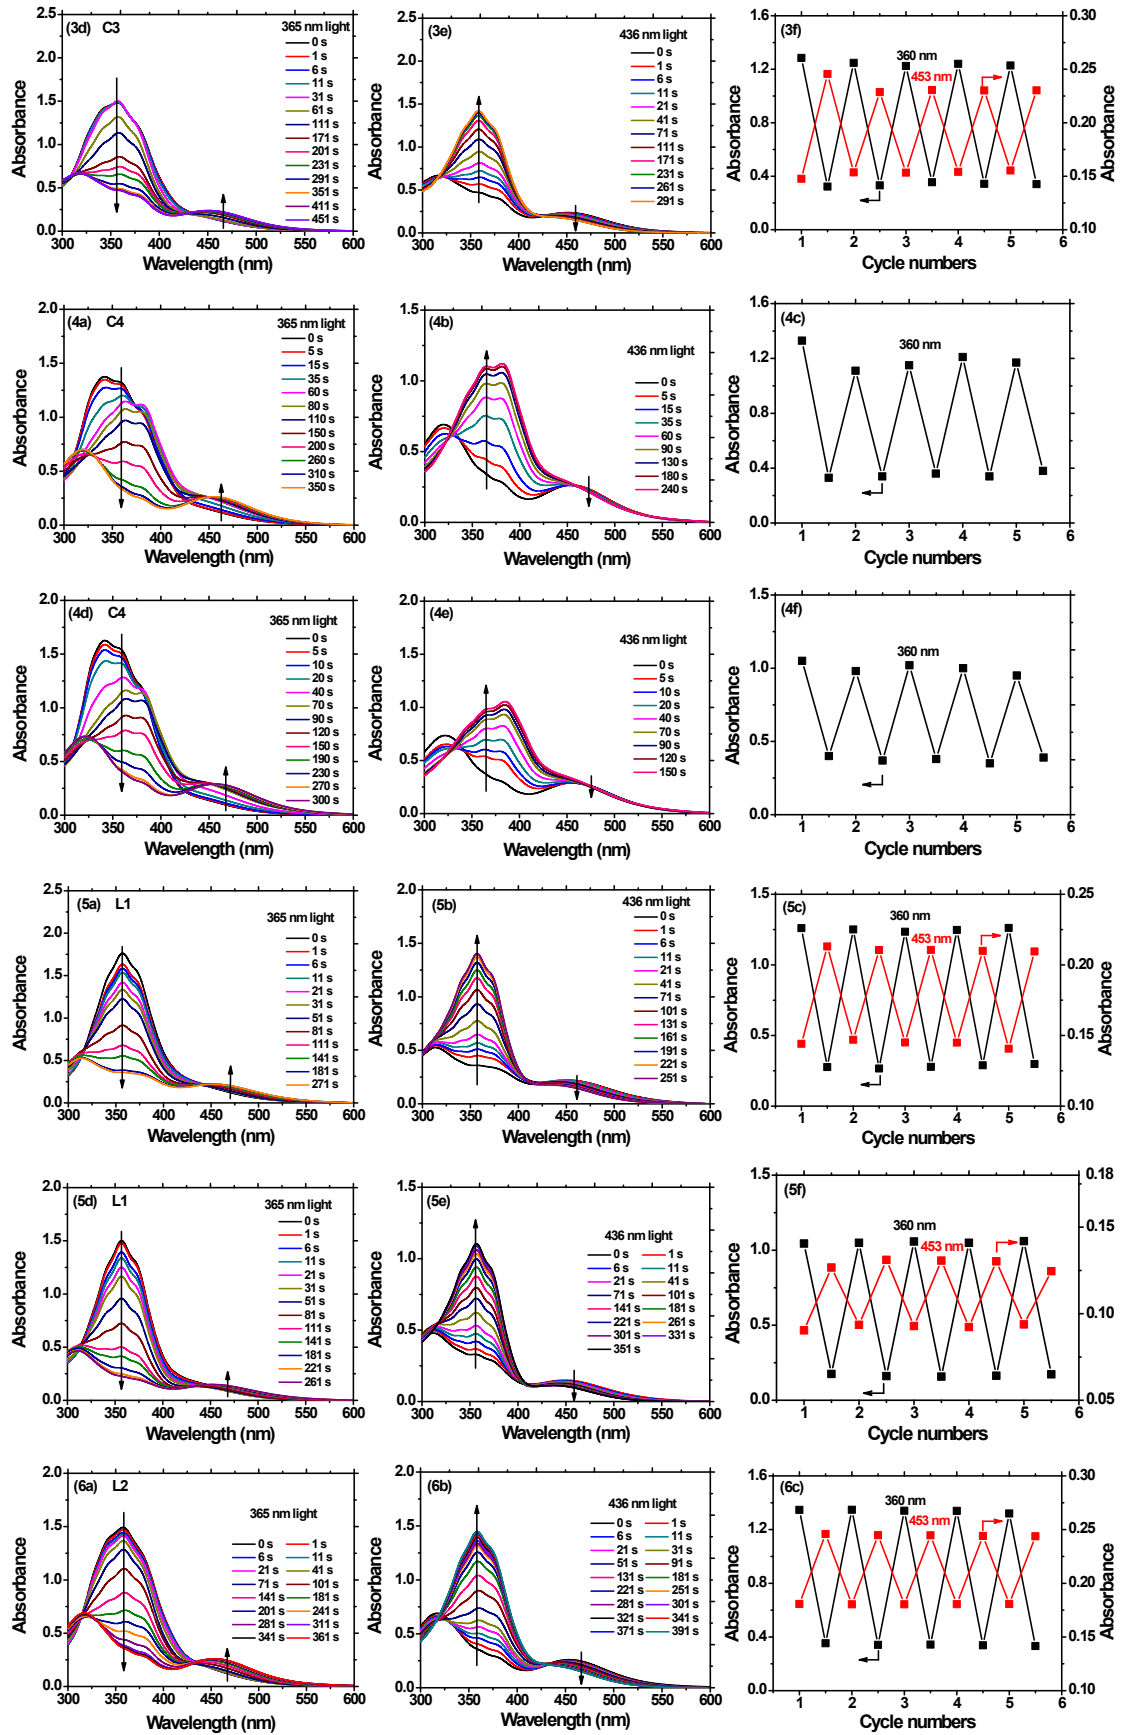

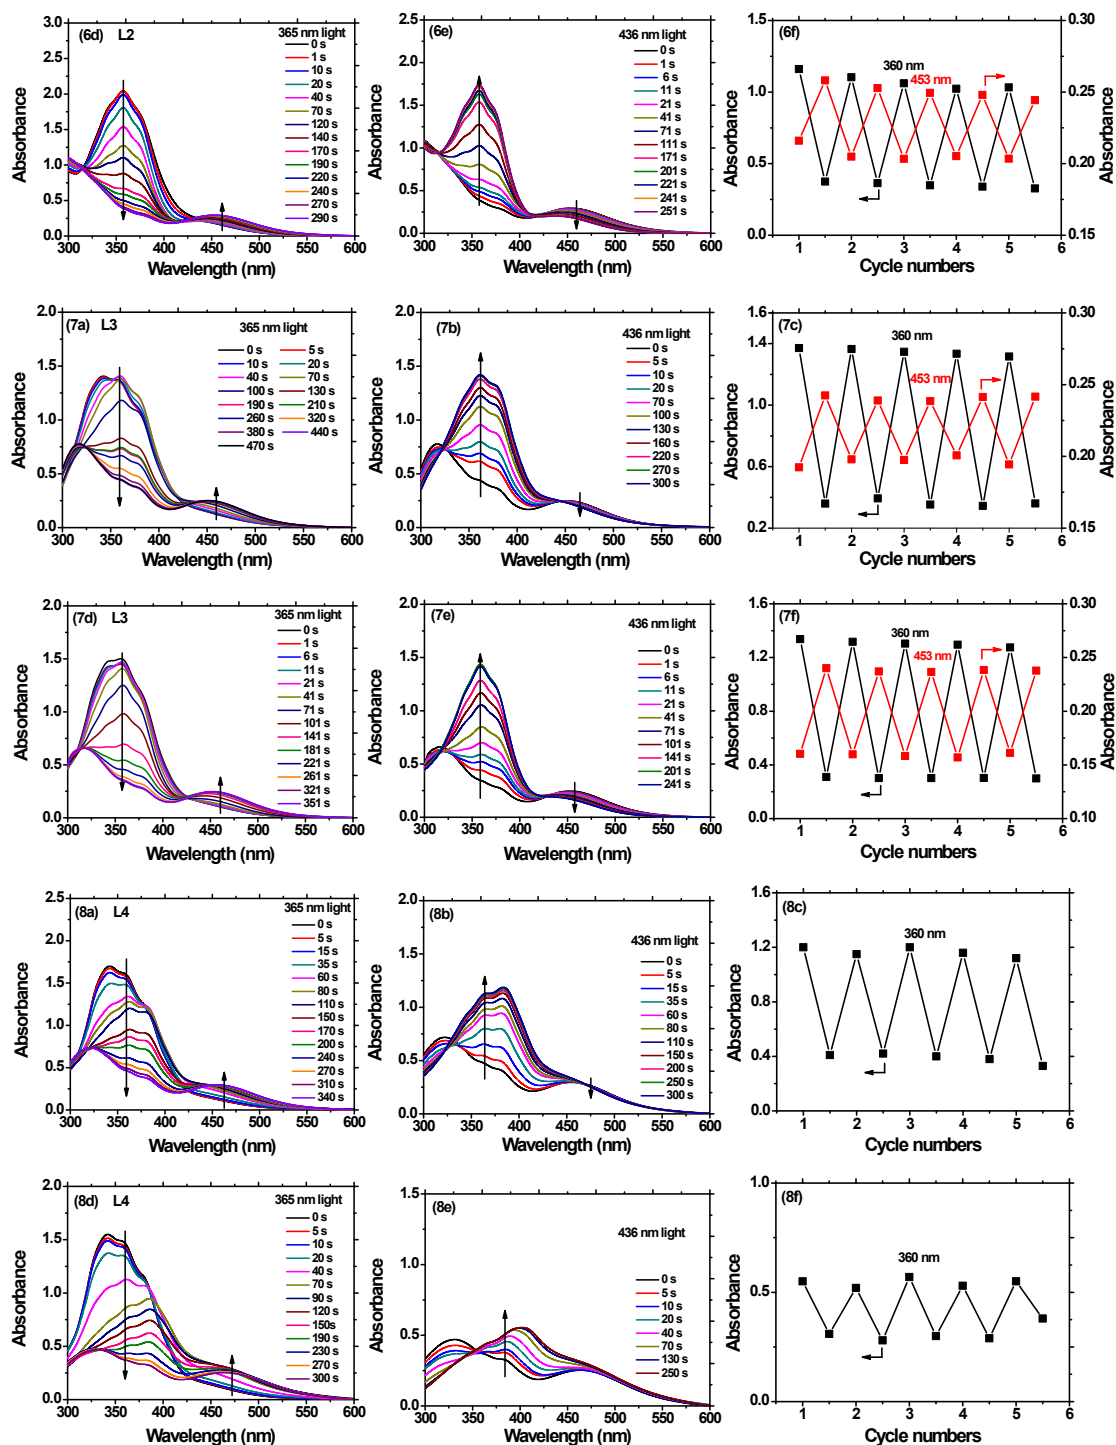

**Fig. S8** Photosomerization switching of the UV-vis spectra ((a, b) DCE/1R and (d, e) DCE/1S) of linear and cyclic Azo polymer aggregates by irradiation with 365 nm and 436 nm light. The UV-vis spectra ((c) DCE/1R and (f) DCE/1S) of linear and cyclic Azo polymer aggregates are switched by alternating irradiation with 365 nm and 436 nm light. The absorbance change for *trans*- and *cis*-form is taken from 360 nm (black)

and 453 nm (red), respectively. The concentration of polymer repeating unit is  $8.42 \times 10^{-5}$  mol/L. 1-4 stands for C1, C2, C3 and C4, respectively. 5-8 stands for L1, L2, L3 and L4, respectively.

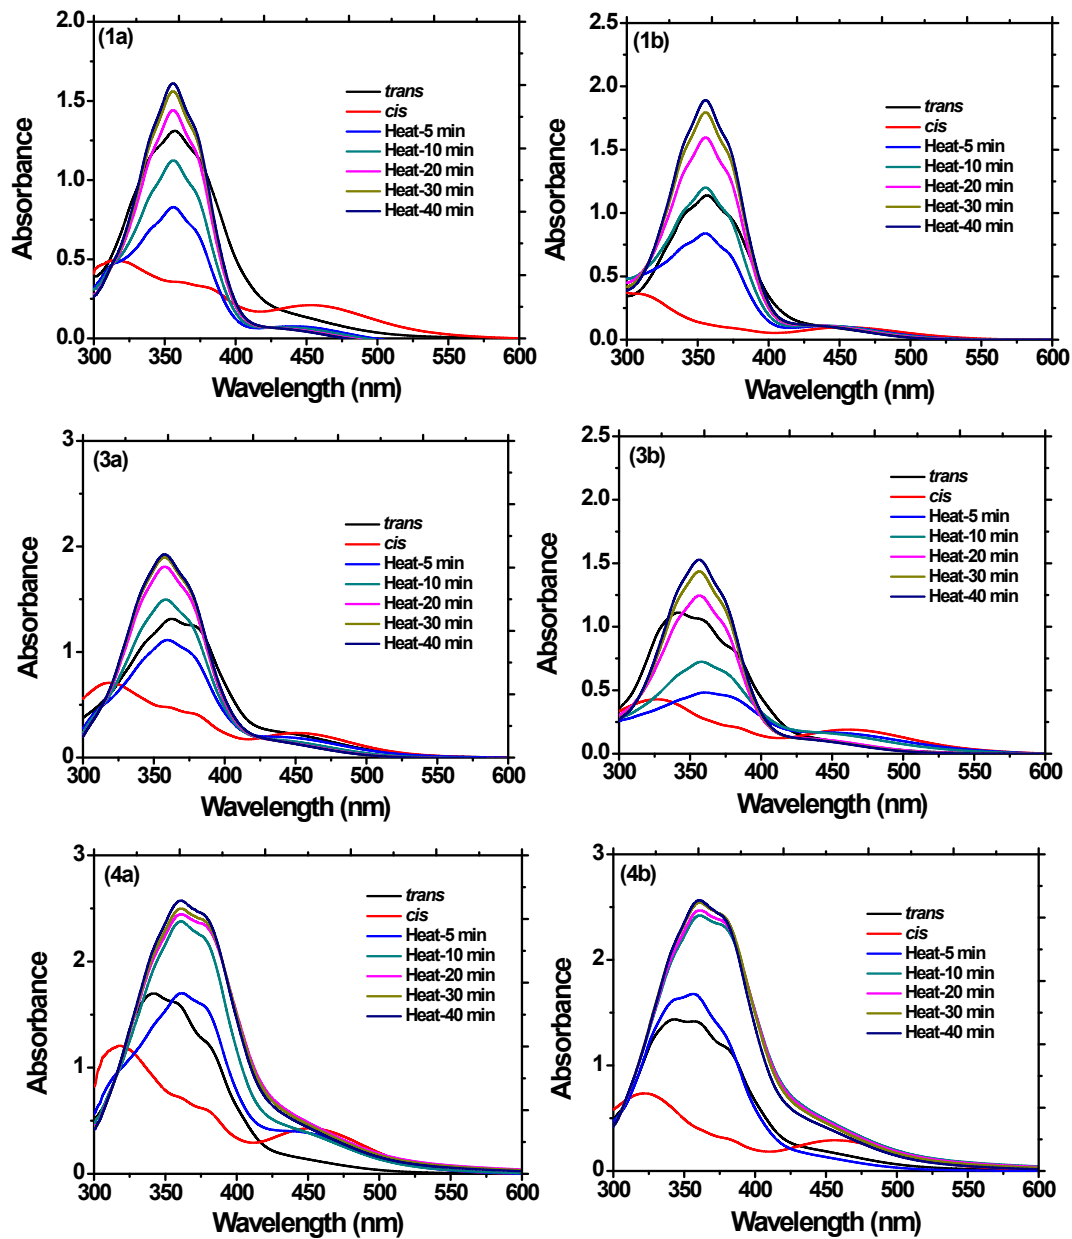

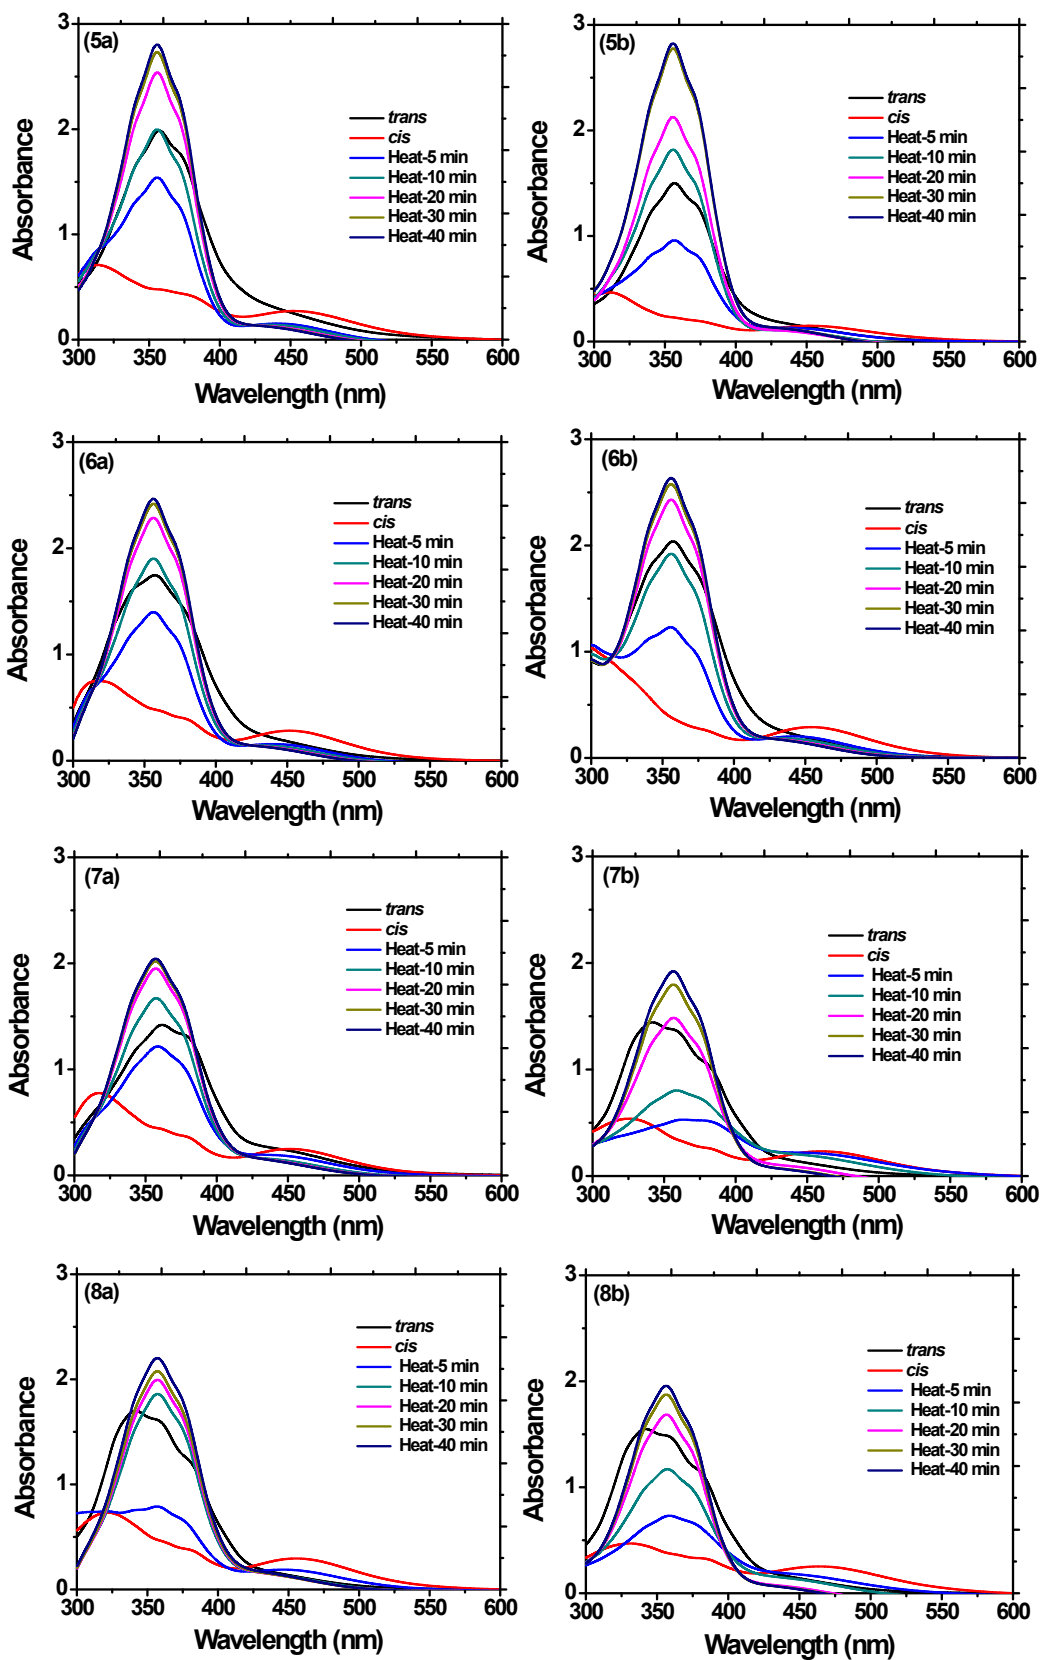

**Fig. S9** The changes of UV-vis spectra with heating time in the process of thermal isomerization at 60 °C ((a) DCE/1R and (b) DCE/1S). The concentration of polymer

repeating unit is  $8.42 \times 10^{-5}$  mol/L. 1-4 stands for C1, C2, C3 and C4, respectively. 5-8 stands for L1, L2, L3 and L4, respectively.

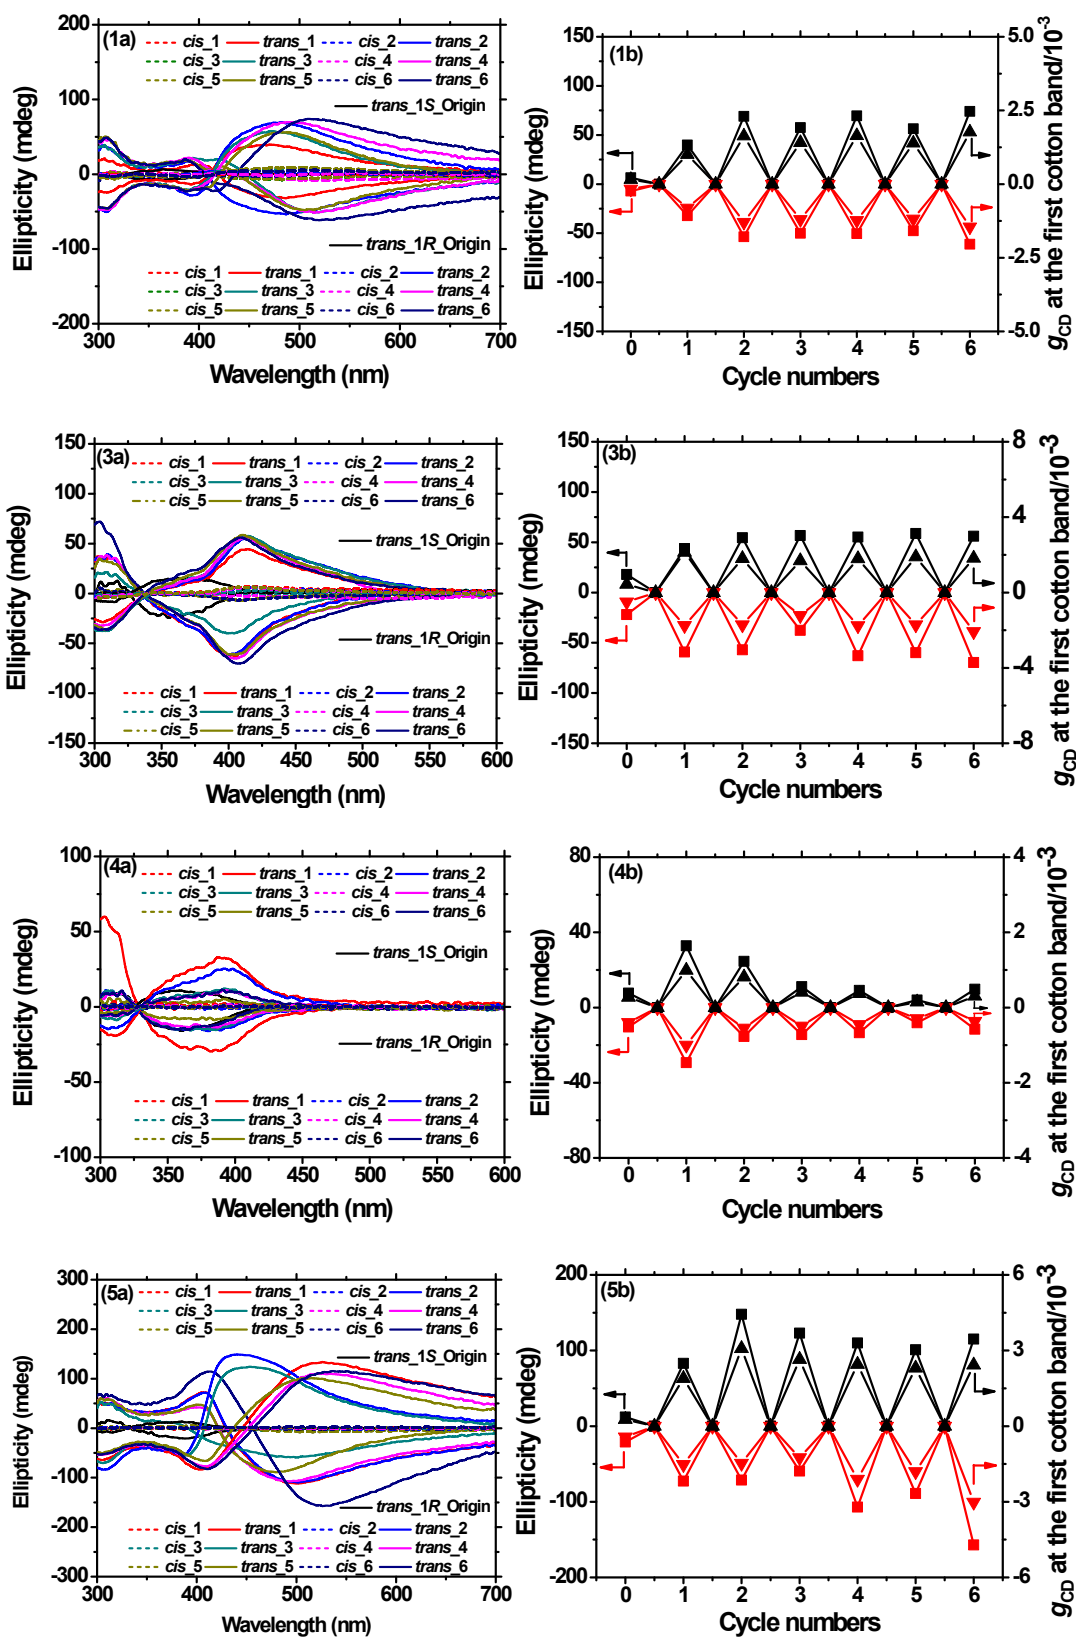

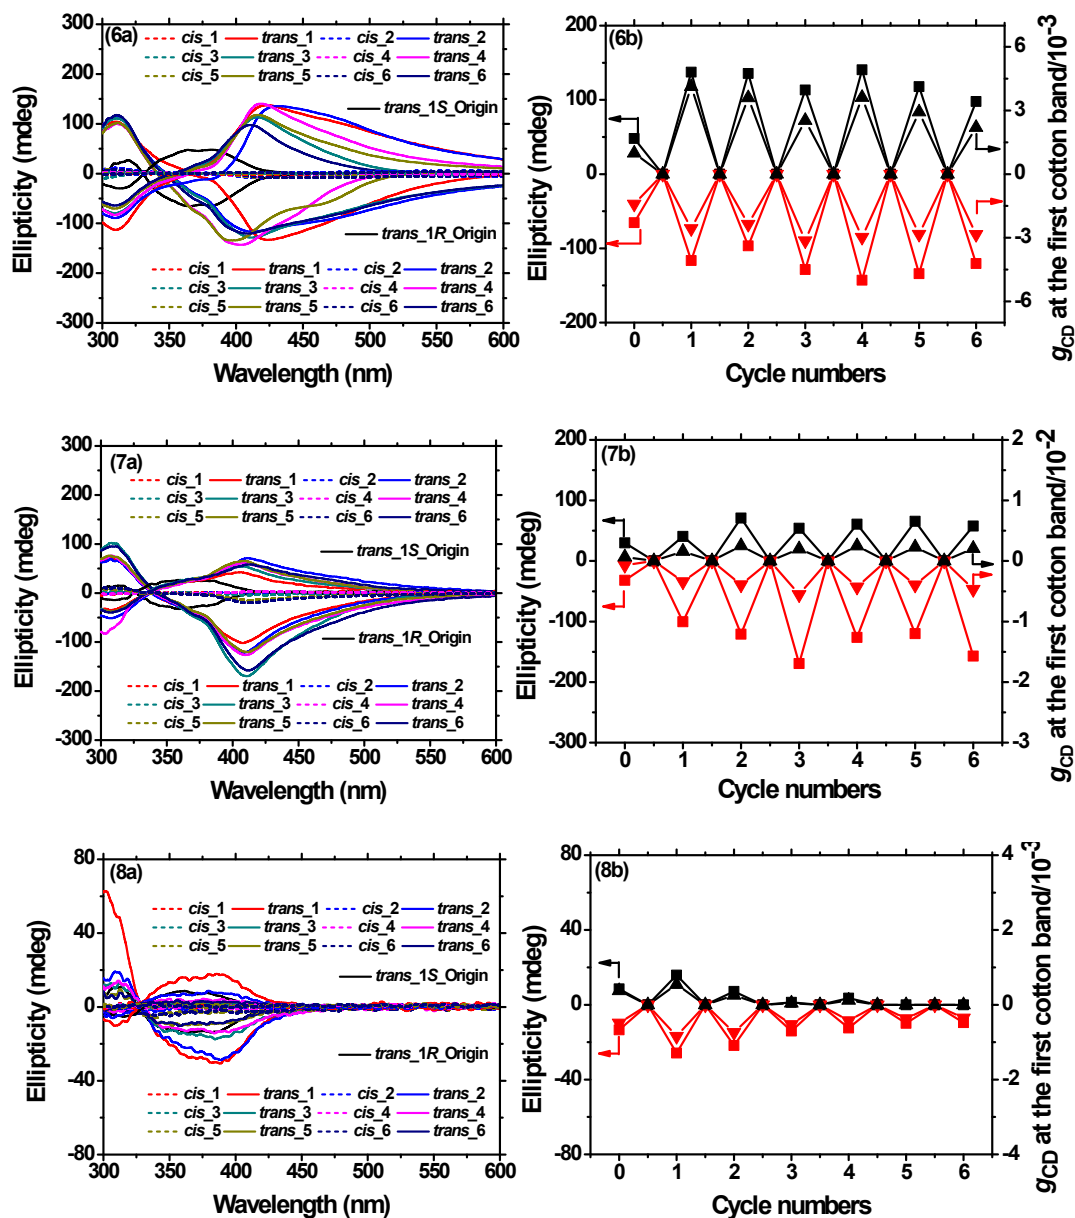

**Fig. S10** Changes in CD spectra (a) and the maximum CD and  $g_{CD}$  values (b) of Azo polymer aggregates in DCE/(1R or 1S) during 365 nm light irradiation (3min) and heating treatment (60 °C for 40 min then cooling to room temperature). The concentration of polymer repeating unit is  $8.42 \times 10^{-5}$  mol/L. 1-4 stands for C1, C2, C3 and C4 respectively. 5-8 stands for L1, L2, L3 and L4, respectively.
